# Supplementary material for: Multiplicate sensitization of novel near-infrared luminescent linear copolymers based on Er, Nd and Yb-complexes
Source: Royal Society of Chemistry journal article supplement (doi:10.1039/c4ra08093a), 2014-01-01
Supplement: c4ra08093a1.pdf [file c4ra08093a1.pdf]

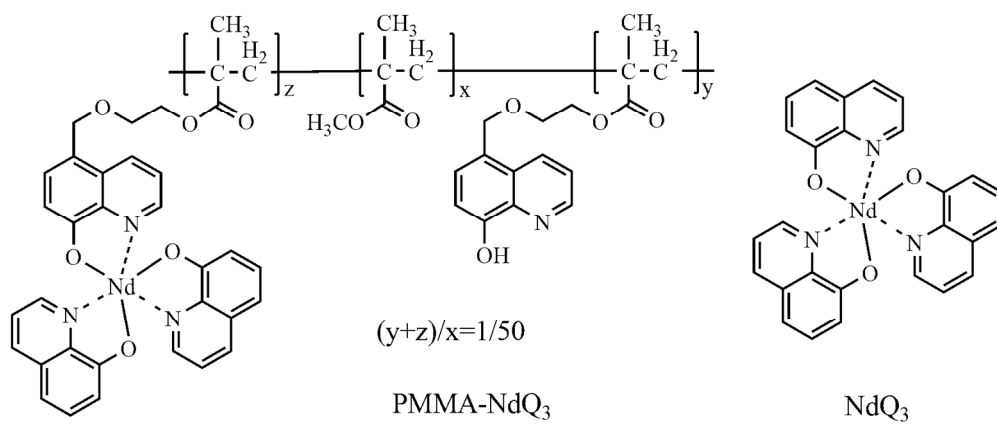

Figure 1S Structure of PMMA-NdQ<sub>3</sub> and NdQ<sub>3</sub>  
150x62mm (300 x 300 DPI)

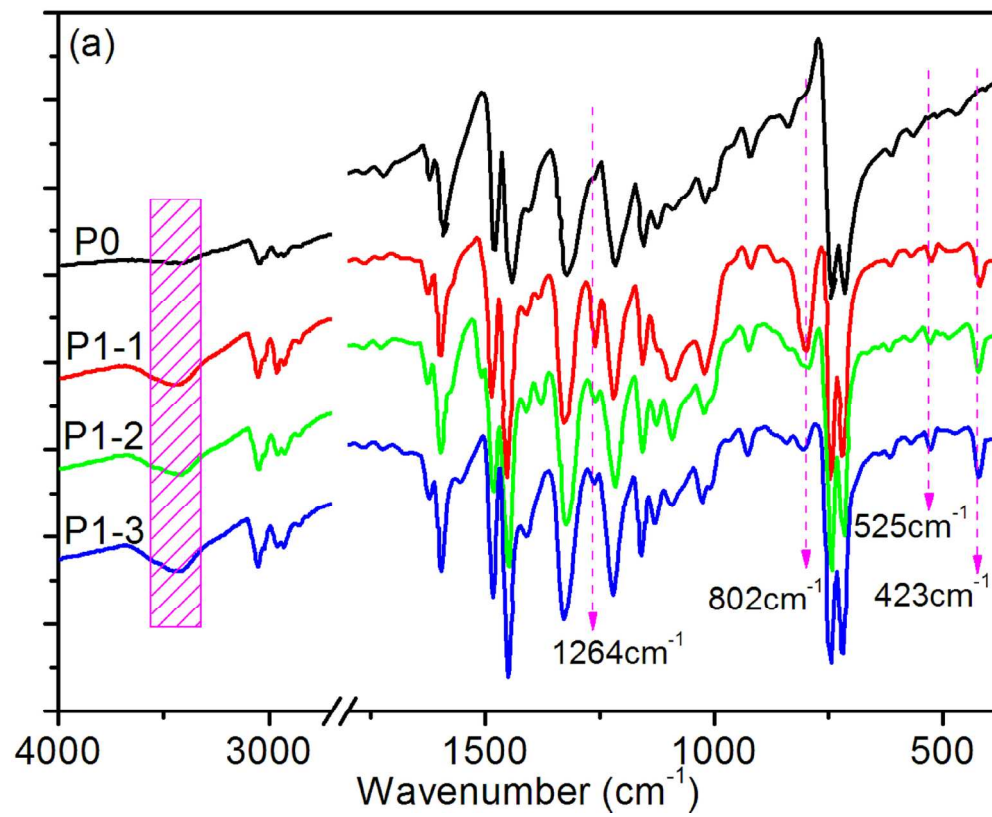

Figure 2S(a) FT-IR spectra of P0 and P1-series copolymers  
73x59mm (600 x 600 DPI)

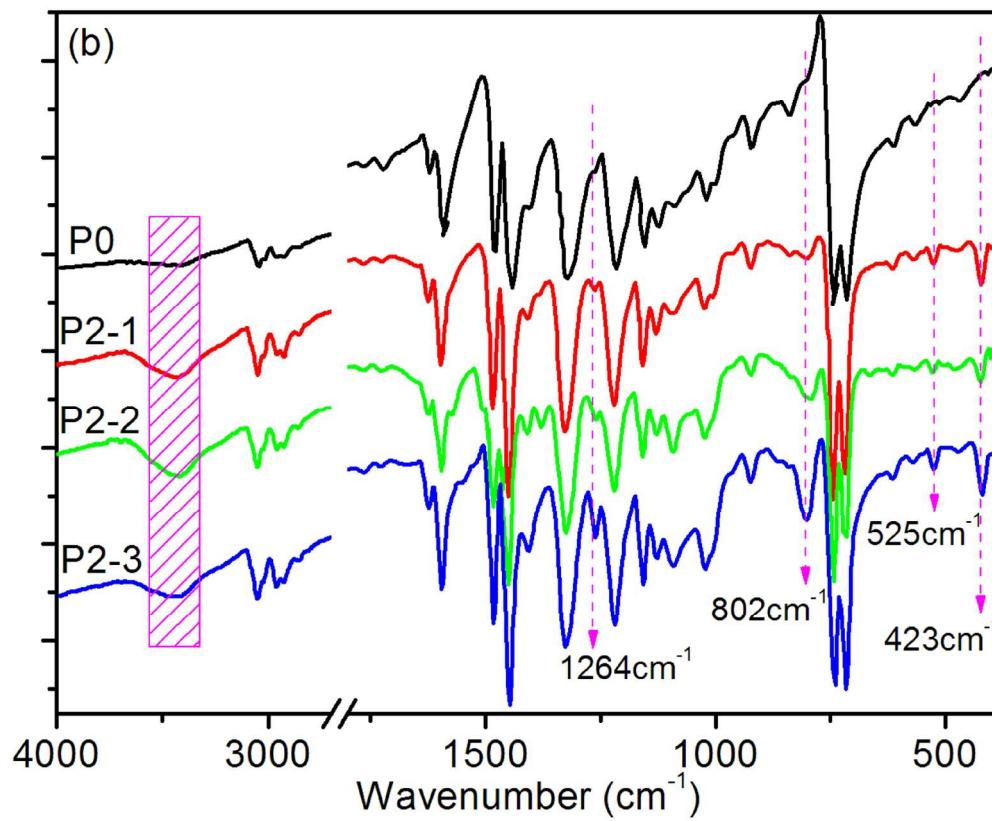

Figure 2S(b) FT-IR spectra of P0 and P2-series copolymers  
73x60mm (600 x 600 DPI)

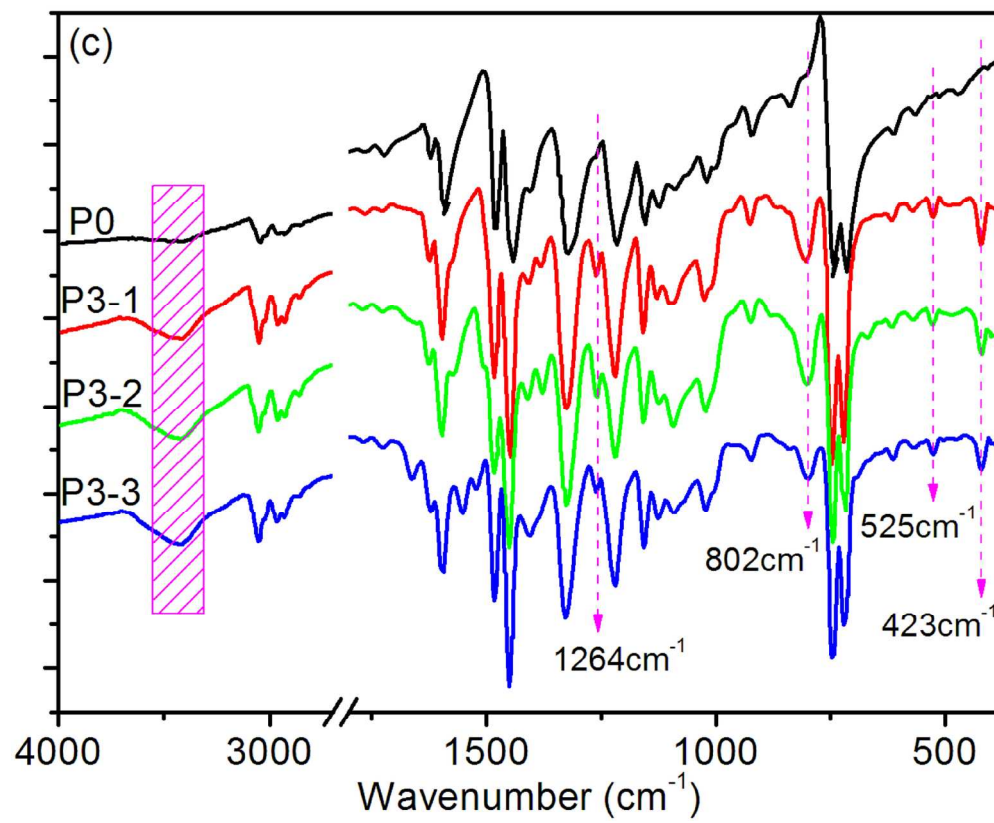

Figure 2S(c) FT-IR spectra of P0 and P3-series copolymers  
74x61mm (600 x 600 DPI)

**Table 1S** Photophysical data of these copolymers

| Copolymers | Absorption peaks wavelength/Absorbance<br>(nm/a.u.)                 | Emission peaks wavelength/Intensity<br>(nm/a.u.)            |
|------------|---------------------------------------------------------------------|-------------------------------------------------------------|
| P1-1       | 238/0.518, 262/0.322, 296/0.254, 330/0.115,<br>345/0.129, 390/0.038 | 1525/17033                                                  |
| P1-2       | 236/0.562, 261/0.477, 295/0.398, 330/0.227,<br>345/0.246, 390/0.094 | 1525/8113                                                   |
| P1-3       | 238/0.854, 261/0.446, 295/0.331, 330/0.140,<br>346/0.159, 390/0.035 | 1525/5754                                                   |
| P2-1       | 238/0.805, 261/0.475, 295/0.370, 330/0.171,<br>345/0.188, 390/0.039 | 817/30686, 886/94186, 980/30686,<br>1060/60460, 1340/13026  |
| P2-2       | 239/1.012, 261/0.708, 295/0.543, 330/0.296,<br>345/0.309, 390/0.133 | 817/29888, 886/118872, 980/30268,<br>1060/97300, 1340/14621 |
| P2-3       | 238/0.883, 261/0.571, 295/0.475, 330/0.285,<br>345/0.308, 390/0.088 | 817/40484, 881/107099, 975/52220,<br>1055/60081, 1341/14621 |
| P3-1       | 238/0.820, 261/0.570, 295/0.446, 330/0.251,<br>346/0.265, 390/0.144 | 980/132859, 999/109013                                      |
| P3-2       | 238/0.790, 261/0.563, 295/0.417, 329/0.240,<br>345/0.258, 390/0.085 | 980/66872, 999/55416                                        |
| P3-3       | 238/1.181, 262/0.728, 295/0.595, 329/0.285,<br>345/0.315, 390/0.125 | 980/22423, 999/14163                                        |
